# Supplementary material for: Budget Impact Analysis of a Renal Point-of-Care Test in Dutch Community Pharmacies to Prevent Antibiotic-Related Hospitalizations
Source: Springer Nature journal article supplement (doi:10.1007/s40258-018-0426-2), 2018-09-02
Supplement: MOESM1 [file 24109734]

## Sheet: OUTCOME
N (patients)
1000000
Total	Costs
PoCT	178.121
Current situation	264.198
Incremental cost-effectiveness ratio	-86.0767

## Sheet: Model 
		>>>>>>>>>>	Decision tree model
																	Hospitalization						54525
																	0.001
																	1.30703	#REF!
			waarden uit database												AE
															0.111
															1307.03		No hospitalization
																	0.999
																	1305.72	#REF!
									GFR < 30		Intervention
									0.0471		1
									11775		11775
															No AE
															0.889
															10468			#REF!
																	Hospitalization
							RF by GP / laboratory										0.001
							0.25										26.443	#REF!
							250000								AE
															0.111
															26443		No hospitalization
																	0.999
																	26416.5	#REF!
									GFR >30		Antibiotic delivered
									0.9529		1
									238225		238225
															No AE
															0.889
															211782			#REF!
					Current situation												Hospitalization
					1000000												1
																	42750	#REF!
															Drug-related AE
															0.057
															42750		No hospitalization
																	0
																	0	#REF!
																	Hospitalization
																	0.001
																	83.25	#REF!
							Antibiotic delivered								AE
							0.75								0.111
							750000								83250		No hospitalization
																	0.999
																	83166.8	#REF!
															No AE						Hospitalization	42859.7
															0.832							4.28597
															624000			#REF!
																		#REF!
	Renal function unknown/outdated
																	Hospitalization				Hospitalization	26371.8
																	0.001					2.63718
																	2.51576	#REF!
															AE
															0.111
															2515.76		No hospitalization
																	0.999
																	2513.25	#REF!
									GFR < 30		Intervention
									0.0471		1											48971.6
									22664.5		22664.5
															No AE
															0.889
															20148.8			#REF!
							RF from GP / laboratory
							0.4812
							481200
																	Hospitalization
																	0.001
																	50.8974	#REF!
															AE
															0.111
															50897.4		No hospitalization
																	0.999
																	50846.5	#REF!
									GFR > 30		Antibiotic delivered
									0.9529		1
									458535		458535
															No AE
															0.889
															407638			#REF!
																	Hospitalization
																	1
							1										26259.9	#REF!
															Drug-related AE
															0.057
															26259.9		No hospitalization
																	0
																	0	#REF!
																	Hospitalization
																	0.001
																	51.1377	#REF!
					New situation		Antibiotic delivered, RF unknown								AE
					1000000		0.4607								0.111
							460700								51137.7		No hospitalization
																	0.999
																	51086.6	#REF!
															No AE
															0.832
															383302			#REF!
																	Hospitalization
																	0.001
																	6.40009	#REF!
															AE
															0.111
															6400.09		No hospitalization
																	0.999
											True -		Antibiotic delivered				6393.69	#REF!
											1		1
											57658.4		57658.4		No AE
															0.889
									GFR > 30						51258.4			#REF!
									0.9924
									57658.4
																	Hospitalization
																	1
																	0	#REF!
															Drug-related AE
															0.057
															0		No hospitalization
																	0
							RF by PoCT				False +		intervention				0	#REF!
							0.0581				0		1
							58100				0		0
																	Hospitalization
																	0.001
																	0	#REF!
															AE
															0.111
															0		No hospitalization
																	0.999
																	0	#REF!
															No AE
															0.832
															0			#REF!
																	Hospitalization
																	0.001
																	0.0471997	#REF!
															AE
															0.111
															47.1997
																	No hospitalization
																	0.999
											True +		Intervention				47.1525	#REF!
											0.963		1
											425.222		425.222
															No AE
															0.889			#REF!
															378.023
									GFR < 30
									0.0076
									441.56
																	Hospitalization
																	1
																	0.93125	#REF!
															Drug-related AE
															0.057
															0.93125		No hospitalization
																	0
																	0	#REF!
											False -		Antibiotic delivered
											0.037		1				Hospitalization
											16.3377		16.3377				0.001
																	0.00181349	#REF!
															AE
															0.111
															1.81349		No hospitalization
																	0.999
																	1.81167	#REF!
															No AE
															0.832
															13.593			#REF!
																		#REF!
							eGFR < 30	3574	1
								159	4.4488	Eerste 3 dagen normale dosis, daarna 50% van dosis
								35	0.979295	Doseerinterval verlengen
								223	6.23951	Vervanging antibioticum
								2335	65.333	Dosering met arts overlegd
								69	1.93061	50% van dosis of doseerinterval verdubbeld
								318	8.89759	50% van dosis
								435	12.1712	Aanpassen naar 500/125 mg 2x per dag

## Sheet: Calculation model
Costs of events		Costs
Standard of Care
RF by GP/laboratory
GFR < 30, intervention, hospitalization		5276.99
GFR < 30, intervention, no hospitalizaton		34944																									Price PoCT
GFR < 30, intervention, no AE		385189																									1994	Dutch community pharmacies in 2016
GFR > 30, antibiotic delivered, hospitalization		106750																									289300	increased number of RF values
GFR > 30, antibiotic delivered, no hospitalization		696200																									145.085	average amount of increased RF values per pharmacy
GFR > 30, antibiotic delivered, no AE		7.67423e+06																									250	price StatSensor
total		8.90259e+06																									1.72312	per patient
Antibiotic delivered
Drug-related AE, hospitalization		2.30109e+08
Drug-related AE, no hospitalization		0
AE, hospitalization		336080
AE, no hospitalization		2.19183e+06
No AE		2.26584e+07
total		2.55295e+08
TOTAL		2.64198e+08
PER PATIENT		264.198
PoCT		1.72312e+06
RF by GP/laboratory
GFR < 30, intervention, hospitalization		10161.8
GFR < 30, intervention, no hospitalization		71950.7
GFR < 30, intervention, no AE		793115
GFR > 30, antibiotic delivered, hospitalization		205473
GFR > 30, antibiotic delivered, no hospitalization		1.34004e+06
GFR > 30, antibiotic delivered, no AE		1.47714e+07
total		1.71921e+07
Antibiotic delivered, RF unknown
Drug-related AE, hospitalization		1.41348e+08
Drug-related AE, no hospitalization		0
AE, hospitalization		206443
AE, no hospitalization		1.34637e+06
No AE		1.39183e+07
total		1.56819e+08
RF by PoCT
GFR > 30, antibiotic delivered, hospitalization		25863
GFR > 30, antibiotic delivered, no hospitalization		194398
GFR > 30, antibiotic delivered, no AE		2.14286e+06
GFR > 30, intervention, drug-related AE, hospitalization		0
GFR > 30, intervention, drug-related AE, no hospitalization		0
GFR > 30, intervention, AE, hospitalization		0
GFR > 30, intervention, AE, no hospitalization		0
GFR > 30, intervention, No AE		0
GFR < 30, intervention, hospitalization		190.755
GFR < 30, intervention, no hospitalization		1452.87
GFR < 30, intervention, no AE		16015.1
GFR < 30, antibiotic delivered, drug-related AE, hospitalization		5017.63
GFR < 30, antibiotic delivered, drug-related AE, no hospitalization		0
GFR < 30, antibiotic delivered, AE, hospitalization		7.32838
GFR < 30, antibiotic delivered, AE, no hospitalization		55.0834
GFR < 30, antibiotic delivered, No AE		569.433
total		2.38643e+06
TOTAL		1.78121e+08
PER PATIENT		178.121

## Sheet: Parameters
Probabilistic	0
		0.08325
		Health state		Live	N	Event		Deterministic
		Standard of Care		1	1000000	1000000
	1a	RF by GP/laboratory		0.25	1000000	250000		0.25
	1a2a	GFR < 30, intervention		0.0471	250000	11775		0.0471
		Aanpassing naar 500/125 mg 2x per dag		0.1217	11775	1433.02		0.1217
		50% van dosis		0.1181	11775	1390.63		0.1181
		Eerste 3 dagen normaal, daarna 50%		0.0445	11775	523.987		0.0445
		Vervanging van nitrofurantoine voor trimethoprim		0.0624	11775	734.76		0.0624
		Dosering met arts overlegd		0.6533	11775	7692.61		0.6533
		check		1		11775		1
	1a2a3a	AE GFR < 30		0.08325	11775	980.269		0.08325
	1a2a3a4a	Hospitalization GFR < 30		0.001	980.269	0.980269		0.001
	1a2a3a4b	No hospitalization GFR < 30		0.999	980.269	979.288		0.999
	1a2a3b	GFR < 30, no AE		0.91675	11775	10794.7		0.91675
	1a2b	GFR > 30, antibiotic delivered		0.9529	250000	238225		0.9529
		Amoxicillin/clavulanic acid		0.1782	238225	42451.7		0.1782
		Cirpfloxacin		0.1222	238225	29111.1		0.1222
		Clarithromycin		0.0364	238225	8671.39		0.0364
		Cotrimoxazole		0.041	238225	9767.23		0.041
		Nitrofurantoin		0.5227	238225	124520		0.5227
		Norfloxacine		0.0207	238225	4931.26		0.0207
		Trimethoprim		0.0788	238225	18772.1		0.0788
		check		1		238225		1
	1a2b3a	AE GFR > 30		0.08325	238225	19832.2		0.08325
	1a2b3a4a	Hospitalization GFR > 30		0.001	19832.2	19.8322		0.001
	1a2b3a4b	No hospitalization GFR > 30		0.999	19832.2	19812.4		0.999
	1a2b3b	GFR > 30, No AE		0.91675	238225	218393		0.91675
	1b	Antibiotic delivered		0.75	1000000	750000		0.75
		Amoxicillin/clavulanic acid		0.1782	750000	133650		0.1782
		Cirpfloxacin		0.1222	750000	91650		0.1222
		Clarithromycin		0.0364	750000	27300		0.0364
		Cotrimoxazole		0.041	750000	30750		0.041
		Nitrofurantoin		0.5227	750000	392025		0.5227
		Norfloxacine		0.0207	750000	15525		0.0207
		Trimethoprim		0.0788	750000	59100		0.0788
		check		1		750000		1
	1b2a	Drug-related AE		0.057	750000	42750		0.057
	1b2a3a	Drug-related AE, hospitalization		1	42750	42750		1
	1b2a3b	Drug-related AE, no hospitalization		0	42750	0		0
	1b2b	AE		0.08325	750000	62437.5		0.08325
	1b2b3a	AE, hospitalization		0.001	62437.5	62.4375		0.001
	1b2b3b	AE, no hospitalization		0.999	62437.5	62375.1		0.999
		check		1		62437.5	0	1
	1b2c	No AE		0.85975	750000	644812		0.85975
		check		1		750000		1
		PoCT		1	1000000	1000000
	1a	RF from GP/laboratory		0.4812	1000000	481200		0.4812
	1a2a	GFR < 30, intervention		0.0471	481200	22664.5		0.0471
		Aanpassing naar 500/125 mg 2x per dag		0.1217	22664.5	2758.27		0.1217
		50% van dosis		0.1181	22664.5	2676.68		0.1181
		Eerste 3 dagen normaal, daarna 50%		0.0445	22664.5	1008.57		0.0445
		Vervanging van nitrofurantoine voor trimethoprim		0.0624	22664.5	1414.27		0.0624
		Dosering met arts overlegd		0.6533	22664.5	14806.7		0.6533
		Check		1		22664.5		1
	1a2a3a	GFR < 30, AE		0.08325	22664.5	1886.82		0.08325
	1a2a3a4a	GFR < 30, hospitalization		0.001	1886.82	1.88682		0.001
	1a2a3a4b	GFR < 30, no hospitalization		0.999	1886.82	1884.93		0.999
	1a2a3b	GFR < 30, no AE		0.91675	22664.5	20777.7		0.91675
	1a2b	GFR > 30, antibiotic delivered		0.9529	481200	458535		0.9529
		Amoxicillin/clavulanic acid		0.1782	458535	81711		0.1782
		Cirpfloxacin		0.1222	458535	56033		0.1222
		Clarithromycin		0.0364	458535	16690.7		0.0364
		Cotrimoxazole		0.041	458535	18800		0.041
		Nitrofurantoin		0.5227	458535	239676		0.5227
		Norfloxacine		0.0207	458535	9491.68		0.0207
		Trimethoprim		0.0788	458535	36132.6		0.0788
		check		1		458535		1
	1a2b3a	GFR > 30, AE		0.08325	458535	38173.1		0.08325
	1a2b3a4a	GFR > 30, hospitalization		0.001	38173.1	38.1731		0.001
	1a2b3a4b	GFR > 30, no hospitalization		0.999	38173.1	38134.9		0.999
	1a2b3b	GFR > 30, no AE		0.91675	458535	420362		0.91675
	1b	Antibiotic delivered, RF unknown		0.4607	1000000	460700		0.4607
		Amoxicillin/clavulanic acid		0.1782	460700	82096.7		0.1782
		Cirpfloxacin		0.1222	460700	56297.5		0.1222
		Clarithromycin		0.0364	460700	16769.5		0.0364
		Cotrimoxazole		0.041	460700	18888.7		0.041
		Nitrofurantoin		0.5227	460700	240808		0.5227
		Norfloxacine		0.0207	460700	9536.49		0.0207
		Trimethoprim		0.0788	460700	36303.2		0.0788
		check		1		460700		1
	1b2a	Drug-related AE		0.057	460700	26259.9		0.057
	1b2a3a	Hospitalization		1	26259.9	26259.9		1
	1b2a3b	No hospitalization		0	26259.9	0		0
	1b2b	AE		0.08325	460700	38353.3		0.08325
	1b2b3a	Hospitalization		0.001	38353.3	38.3533		0.001
	1b2b3b	No hospitalizion		0.999	38353.3	38314.9		0.999
	1b2c	No AE		0.85975	460700	396087		0.85975
		check		1		460700		1
	1c	RF by PoCT		0.0581	1000000	58100		0.0581
		check		1
	1c2a	GFR > 30		0.9924	58100	57658.4		0.9924
	1c2a3a	True -, antibiotic delivered		1	57658.4	57658.4		1
		Amoxicillin/clavulanic acid		0.1782	57658.4	10274.7		0.1782
		Cirpfloxacin		0.1222	57658.4	7045.86		0.1222
		Clarithromycin		0.0364	57658.4	2098.77		0.0364
		Cotrimoxazole		0.041	57658.4	2364		0.041
		Nitrofurantoin		0.5227	57658.4	30138.1		0.5227
		Norfloxacine		0.0207	57658.4	1193.53		0.0207
		Trimethoprim		0.0788	57658.4	4543.49		0.0788
		check		1		40337.8		1
	1c2a3a4a	GFR > 30, true-, AE		0.08325	57658.4	4800.07		0.08325
	1c2a3a4a5a	AE, hospitalization		0.001	4800.07	4.80007		0.001
	1c2a3a4a5b	AE, no hospitalization		0.999	4800.07	4795.27		0.999
	1c2a3a4b	GFR > 30, true-, no AE		0.91675	57658.4	52858.4		0.91675
	1c2a3b	False+, intervention		0		0		0
		Aanpassing naar 500/125 mg 2x per dag		0		0		0
		50% van dosis		0		0		0
		Eerste 3 dagen normaal, daarna 50%		0		0		0
		Vervanging van nitrofurantoine voor trimethoprim		0		0		0
		Dosering met arts overlegd		0		0		0
		Check
	1c2a3b4a	False+, Drug-related AE		0		0		0
	1c2a3b4a5a	Hospitalization		0		0		0
	1c2a3b4a5b	No Hospitalization		0		0		0
	1c2a3b4b	False+, AE		0		0		0
	1c2a3b4b5a	Hospitalization		0		0		0
	1c2a3b4b5b	No hospitalization		0		0		0
	1c2a3b4c	False+, No AE		0		0		0
		check
	1c2b	GFR < 30		0.0076	58100	441.56		0.0076
	1c2b3a	GFR < 30, true+, intervention		0.963	441.56	425.222		0.963
		Aanpassing naar 500/125 mg 2x per dag		0.1217	425.222	51.7496		0.1217
		50% van dosis		0.1181	425.222	50.2188		0.1181
		Eerste 3 dagen normaal, daarna 50%		0.0445	425.222	18.9224		0.0445
		Vervanging van nitrofurantoine voor trimethoprim		0.0624	425.222	26.5339		0.0624
		Dosering met arts overlegd		0.6533	425.222	277.798		0.6533
		Check		1		425.222		1
	1c2b3a4a	GFR < 30, true+, AE		0.08325	425.222	35.3998		0.08325
	1c2b3a4a5a	AE, hospitalization		0.001	35.3998	0.0353998		0.001
	1c2b3a4a5b	AE, no hospitalization		0.999	35.3998	35.3644		0.999
	1c2b3a4b	GFR < 30, true+, no AE		0.91675	425.222	389.823		0.91675
	1c2b3b	GFR < 30, false-, antibiotic delivered		0.037	441.56	16.3377		0.037
		Amoxicillin/clavulanic acid		0.1782	16.3377	2.91138		0.1782
		Cirpfloxacin		0.1222	16.3377	1.99647		0.1222
		Clarithromycin		0.0364	16.3377	0.594693		0.0364
		Cotrimoxazole		0.041	16.3377	0.669847		0.041
		Nitrofurantoin		0.5227	16.3377	8.53973		0.5227
		Norfloxacine		0.0207	16.3377	0.338191		0.0207
		Trimethoprim		0.0788	16.3377	1.28741		0.0788
		check		1		11.4299		1
	1a2b3b4a	False-, drug-related AE		0.057	16.3377	0.93125		0.057
	1a2b3b4a5a	Hospitalization		1	0.93125	0.93125		1
	1a2b3b4a5b	No hospitalization		0	0.93125	0		0
	1a2b3b4b	False-, AE		0.08325	16.3377	1.36012		0.08325
	1a2b3b4b5a	Hospitalization		0.001	1.36012	0.00136012		0.001
	1a2b3b4b5b	No hospitalization		0.999	1.36012	1.35876		0.999
	1a2b3b4c	False-, no AE		0.85975	16.3377	14.0464		0.85975
		check		1		16.3377		1
		1e+06
		1e+06

## Sheet: Parameters costs
Events	live	Deterministic	0.75	1.25			Notes
Intervention
875/125 mg 2x daily	36.15	36.15					for amox/clav
50% of dosis	35.1833	35.1833					average norfloxacin, ciprofloxacin en claritromycin
First 3 days normal dose, then 50%	33.81	33.81					for trimethoprim
Change of nitrofurantoine to trimethoprim	33.81	33.81					for nitrofurantoin --> trimethoprim
Dose consultation with GP/specialist	35.9929	35.9929	26.9946	44.9911
Antibiotic delivered
Amoxicillin/clavulanic acid	38.03	38.03
Ciprofloxacin	35.5	35.5
Clarithromycin	37.17	37.17
Cotrimoxazole	34.99	34.99
Nitrofurantoin	34.01	34.01
Norfloxacine	38.44	38.44
Trimethoprim	33.81	33.81
Hospitalization	5347.52	5347.52	4010.64	6684.4
PoCT	5.4	5.4	4.05	6.75
Statsensor Creatinine	250	250	187.5	312.5

## Sheet: Transition probabilities
State in decision tree	N (patients)	Events	PR %			Source
Renal function obtained from GP			25			Assumption
Antibiotic delivered, RF unknown			75			Assumption
Hospitalization			0.1			Medication leaflet CBG-MEB (assumption)
Adverse events			11.1
Often	10	1	10			Medication leaflet CBG-MEB
Sometimes	100	1	1			Medication leaflet CBG-MEB
Rarely	1000	1	0.1			Medication leaflet CBG-MEB
Drug-related hospitalization (AE)	714	41	5.7423			Leendertse A. et al., 2012
(related to a medication error and renal impairment)
Drug-related hospitalization (AE)	714	39	5.46			Leendertse A. et al., 2012
(Renal function not monitored before admission-> dosing error and drug-disease interaction)
Prevalence impaired kidney function (GFR < 30) in Netherlands (stage 4 & 5)		66400	0.04			Annual report Dutch Kidney Foundation 2015. Nierpatienten vereniging Nederland. Nierstichting. Mensen met matig tot ernstig verminderde nierfunctie in beeld. VU medisch centrum.
Probabilities from Service Apotheek data set
				Mean age
RF from GP/laboratory	26588	11586	43.576	80		Dataset Ncontrol
Antibiotic delivered, RF unknown	26588	13504	50.7898	80		Dataset Ncontrol
Renal function measured with PoCT in public pharmacy	26588	1498	5.63412	80		Dataset Ncontrol
RF from GP/laboratory -> eGFR < 30 ml/min/1,73 m2	11156	645	5.78164	80		Dataset Ncontrol
RF from GP/laboratory -> eGFR > 30 ml/min/1,73 m2	11156	10511	94.2184	80		Dataset Ncontrol
RF by PoCT, eGFR < 30 ml/min/1,73 m2	1412	10	0.708215	80		Dataset Ncontrol
RF by PoCT, eGFR > 30 ml/min/1,73 m2	1412	1402	99.2918	80		Dataset Ncontrol
Renal function unknown in pharmacy	1632	435	26.6544	77.6		Koster S. et al., 2016
Renal function available in pharmacy	1632	1179	72.2426	77.6		Koster S. et al., 2016
Renal function obtained from GP	1201	1082	90.0916	77.6		Koster S+A36:G38. et al., 2016
Renal function unknown in pharmacy	27307	3488	12.8			Heringa et al., 2017
Renal function stayed unknown, but medication deliverd	27307	3693	13.5			Heringa et al., 2017
Renal function available in pharmacy	27307	20126	73.7			Heringa et al., 2017
Impaired kidney function	21494	25	0.12			Heringa et al., 2017
Drug intervention (dose adjustment/chance of antibiotic)	21494	2	0.009			Heringa et al., 2017	0.098
		27.7574	%
		72.2426	%

## Sheet: Costs
Events	Direct Costs	Cost updated to year 2016	Notes	Reference
Hospitalization
ED visit	219	220.975		Magdelijns J.H. et al., 2014; Direct health care costs of hospital admissions due to adverse events in the Netherlands			2015	1.006
Inpatient days	3240	3269.22		Magdelijns J.H. et al., 2014			2016	1.003
Blood testing	275.93	278.418		Magdelijns J.H. et al., 2014
Imaging studies	199.77	201.572		Magdelijns J.H. et al., 2014
Interventions	75.18	75.858		Magdelijns J.H. et al., 2014
Transfusions	102.12	103.041		Magdelijns J.H. et al., 2014
Infusions	22.35	22.5516		Magdelijns J.H. et al., 2014			Inflationfactor	CPI (CBS)
Antibiotics	32.49	32.783		Magdelijns J.H. et al., 2014			2007	1.016
Total € / patient	4166.84	4204.42					2008	1.025
							2009	1.012
82 days at ICU	5986.83	7000.81		Leendertse et al., 2011 pricepoint 2006	(costs deflated to 2006)		2010	1.013
ER visits	144.634	169.131		Leendertse et al., 2011 pricepoint 2006			2011	1.023
Transportation by ambulance to hospital	92.6732	108.369		Leendertse et al., 2011 pricepoint 2006			2012	1.025
Specialist consulting during admission	54.9608	64.2694		Leendertse et al., 2011 pricepoint 2006			2013	1.025
Specialist consulting at admission	80.0915	93.6564		Leendertse et al., 2011 pricepoint 2006			2014	1.01
Medical procedures	973.778	1138.7		Leendertse et al., 2011 pricepoint 2006			2015	1.006
Total €/patient	7332.97	8574.94					2016	1.003
							2017	1.011
Average cost one preventable admission	5071	5929.86		Leendertse et al., 2011
Normal care inpatient day	416.41	486.936		Leendertse et al., 2011
Daycare per day
> General hospital	443	446.995		Dutch manual for cost research (Handleiding voor Kostenonderzoek), pricepoint 2014
> Academic hospital	642	647.79		Dutch manual for cost research (Handleiding voor Kostenonderzoek), pricepoint 2014
> ICU	1186	1196.7		Dutch manual for cost research (Handleiding voor Kostenonderzoek), pricepoint 2014
Daycare	276	278.489		Dutch manual for cost research (Handleiding voor Kostenonderzoek), pricepoint 2014
Policlinic	91	91.8206	weighted average	Dutch manual for cost research (Handleiding voor Kostenonderzoek), pricepoint 2014
> General hospital	80	80.7214		Dutch manual for cost research (Handleiding voor Kostenonderzoek), pricepoint 2014
> Academic hospital	163	164.47		Dutch manual for cost research (Handleiding voor Kostenonderzoek), pricepoint 2014
ER	259	261.336	Assumed ER visit for all medication-related hospitalizations	Dutch manual for cost research (Handleiding voor Kostenonderzoek), pricepoint 2014
GP consult				Dutch manual for cost research (Handleiding voor Kostenonderzoek), pricepoint 2014
> Standard	33	33.2976		Dutch manual for cost research (Handleiding voor Kostenonderzoek), pricepoint 2014
> At home consultation	50	50.4509		Dutch manual for cost research (Handleiding voor Kostenonderzoek), pricepoint 2014
> Contact by phone	17	17.1533		Dutch manual for cost research (Handleiding voor Kostenonderzoek), pricepoint 2014
Dietary advice	27	27.2435		Dutch manual for cost research (Handleiding voor Kostenonderzoek), pricepoint 2014
HARM study
average length of stay (11,17 dag)	4013	4692.67		HARM study, 2006
average length of stay ICU (0,25 dag)	421	492.304
ER visit	139	162.542
Total	4573	5347.52
PoCT	5.4		per strip
	250		per apparatus, one per pharmacy (351 included in study)
Normal eGFR
Costs ciprofloxacin, 28 tabs, 500 mg		2.2		medicijnkosten.nl August 2017, indexed using inflationrates from CBS (Statistics Netherlands)
GP		33.3		handleiding voor kostenonderzoek pricepoint 2014, indexed using CBS inflation rates
TOTAL		35.5
Costs nitrofurantoin 10 tabs, 100 mg		0.71
GP		33.3
TOTAL		34.01
Costs trimethoprim 3 tabs, 300 mg		0.51
GP		33.3
TOTAL		33.81
Costs claritromycin 28 tabs, 250 mg		3.87
GP		33.3
TOTAL		37.17
Costs cotrimoxazol 10 tabs, 960 mg		1.69
GP		33.3
TOTAL		34.99
Costs norfloxacin 20 tabs, 400 mg		5.14
GP		33.3
TOTAL		38.44
Costs amoxicillin/clavulanic acid 42 tabs, 500/125 mg		4.73
GP		33.3
TOTAL		38.03
Average price		35.9929
eGFR < 30
Costs ciprofloxacin 14 tabs, 500mg		1.09
GP		33.3
TOTAL		34.39
Costs nitrofurantoin --> trimethoprim 3 tabs, 300mg		0.51
GP		33.3
TOTAL		33.81
Costs trimethoprim 3 tabs, 300mg		0.51
GP		33.3
TOTAL		33.81
Costs claritromycin 14 tabs, 250mg		1.93
GP		33.3
TOTAL		35.23
Costs cotrimoxazole 8 tabs, 980mg		1.35
GP		33.3
TOTAL		34.65
Costs norfloxacin 10 tabs, 400mg		2.63
GP		33.3
TOTAL		35.93
Costs amoxicillin/calvulanic acid 16 tabs, 875/125mg		2.85
GP		33.3
TOTAL		36.15
Claritromycine+Norfloxacine+ciprofloxacine		35.1833
HARM study
Average daycare	11,17*(0,84*3337 + 0,16*476)
average stay ICU	0,25*1684
ER visit	1*139
Total
Aantal dagen verpleegafdeling, aantal dagen intensive care, daadwerkelijk in rekening gebrachte kosten via DBC. Number of days at ICU,
Daarnaast is uitgegeaan van kosten voor SEH bezoek voor alle geneesmiddel gerelateerde opnames.

## Sheet: Sens, spec
Specificity and sensitivity PoCT creatinine meter
True +	0.963
False -	0.037
True -	1
False +	0
Severe kindney function (< 30 ml/min/1.73m)
Spec	1
Sens	96.3%
Moderate to severe kindey function (<45 ml/min/1.73m and >30 ml/min/1.73m)
Spec	1
Sens	93.4%
Mild to moderate kindey function (<60 ml/min/1.73m and >45 ml/min/1.73m)
Spec	92.9%
Sens	88.2%
Normal kidney function > 80 ml/min/1.73m (according to European Medicines Agency EMA)
After the age of 30, the kindey function decreases with approximately 10 ml/min/1.73m per year.
*KNMP nierfunctie

## Sheet: Scenario analyses + USA
Scenario analysis varying the availability of renal function values from different sources*
* The availability needed to be adjusted in the tab 'Model'
		5% increased availability	10% increased availability	20% increased availability
	RF provided by GP/lab	- €101.31	- €116.54	- €147.01
	RF provided by PoCT	- €101.04	- €116.01	- €145.94
	RF by GP/lab and PoCT	- €116.28	- €146.48	- €206.87
Univariate sensitivity analysis
	0.75	1.25	75% of deterministic value	125% of deterministic value
Statsensor Creatinine	187.5	312.5	-€ 86.51	-€ 85.65
PoCT strip costs	4.05	6.75	-€ 86.16	-€ 86.00
Hospitalization costs	4010.64	6684.4	-€ 64.03	-€ 108.12
Costs consultation with prescriber	26.9946	44.9911	-€ 86.14	-€ 86.01
